# Supplementary material for: Perceived efficacy of HIV treatment-as-prevention among university students in Johannesburg, South Africa
Source: HighWire-hosted journal article supplement (doi:10.1136/sextrans-2021-055031), 2021-09-11

## SUPPLEMENTAL DIGITAL CONTENT

**Supplement to:** Bor J, Musakwa N, Onoya D, Evans D. Perceived efficacy of HIV treatment-as-prevention among university students in Johannesburg, South Africa. *Sexually Transmitted Infections*.

## CONTENTS

**Suppl Table 1. Visual Analogue Scale to elicit perceptions of HIV transmission risk in four scenarios.**

**Suppl Table 2. Questions included to ask about perceptions of HIV risk, particularly around HIV transmission and treatment as prevention.**

**Suppl. Table 3. Participant Characteristics and Perceived Efficacy of TasP**

**Suppl Figure 1. Differences in perceived risk: (a) 1 vs. 52 sex acts and (b) ART vs. no ART.**

**Suppl Table 1. Visual Analogue Scale to elicit perceptions of HIV transmission risk in four scenarios.**

| Question                                                                                                                                                                                                                                                                                                                | Scale                                                                                |
|-------------------------------------------------------------------------------------------------------------------------------------------------------------------------------------------------------------------------------------------------------------------------------------------------------------------------|--------------------------------------------------------------------------------------|
| 1. Consider a woman who does not have HIV. Imagine she has sex one time with a man who is HIV-infected and they do not use a condom. Choose a number from 0 to 20 to reflect how likely you think it is that she will become infected with HIV.                                                                         |    |
| 2. Consider a woman who does not have HIV. Imagine she has sex one time very week for a year (52 times) with a man who is HIV-infected and they do not use a condom. Choose a number from 0 to 20 to reflect how likely you think it is that she will become infected with HIV.                                         |    |
| 3. Consider a woman who does not have HIV. Imagine she has sex one time without a condom with a man who is HIV-infected but who is taking ARVs every day and is virally suppressed. Choose a number from 0 to 20 to reflect how likely you think it is that she will become infected with HIV.                          |   |
| 4. Consider a woman who does not have HIV. Imagine she has sex one time very week for a year (52 times) without a condom with a man who is HIV-infected but taking ARVs every day and is virally suppressed. Choose a number from 0 to 20 to reflect how likely you think it is that she will become infected with HIV. |  |

**Suppl Table 2. Questions included to ask about perceptions of HIV risk, particularly around HIV transmission and treatment as prevention.**

| Question                                                                       | Scale                     |   |
|--------------------------------------------------------------------------------|---------------------------|---|
| 1. What is your gut feeling about how likely you are to get infected with HIV? | Extremely unlikely        | 0 |
|                                                                                | Very unlikely             | 1 |
|                                                                                | Somewhat likely           | 2 |
|                                                                                | Very likely               | 3 |
|                                                                                | Extremely likely          | 4 |
| 2. I worry about getting infected with HIV                                     | None of the time          | 0 |
|                                                                                | Rarely                    | 1 |
|                                                                                | Some of the time          | 2 |
|                                                                                | A moderate amount of time | 3 |
|                                                                                | A lot of the time         | 4 |
|                                                                                | All of the time           | 5 |
| 3. Picturing myself getting HIV is something I find:                           | Very hard to do           | 0 |
|                                                                                | Hard to do                | 1 |
|                                                                                | Easy to do                | 2 |
|                                                                                | Very easy to do           | 3 |
| 4. I am sure I will NOT get infected with HIV                                  | Strongly disagree         | 0 |
|                                                                                | Disagree                  | 1 |
|                                                                                | Somewhat disagree         | 2 |
|                                                                                | Agree                     | 3 |
|                                                                                | Strongly agree            | 4 |
| 5. I feel vulnerable to HIV infection                                          | Strongly disagree         | 0 |
|                                                                                | Disagree                  | 1 |
|                                                                                | Somewhat disagree         | 2 |
|                                                                                | Agree                     | 3 |
|                                                                                | Strongly agree            | 4 |

**Suppl. Table 3. Participant Characteristics and Perceived Efficacy of TasP**

| <b>Participant characteristics (N=365)</b> | <b>N (%)<br/>in each group</b> | <b>Perceived<br/>TasP<br/>efficacy<br/>Mean (SD)</b> | <b>P-value<sup>sss</sup></b> |
|--------------------------------------------|--------------------------------|------------------------------------------------------|------------------------------|
| <b>Gender</b>                              |                                |                                                      |                              |
| Male                                       | 187 (51.2%)                    | 19.3 (23.3)                                          | 0.758                        |
| Female                                     | 176 (48.2%)                    | 21.6 (27.0)                                          |                              |
| Missing                                    | 2 (0.6%)                       | 2.8 (3.9)                                            |                              |
| <b>Age, years</b>                          |                                |                                                      |                              |
| 18 – 19                                    | 164 (44.9%)                    | 23.0 (27.4)                                          | 0.128                        |
| 20 – 25                                    | 195 (53.4%)                    | 18.4 (23.3)                                          |                              |
| Missing                                    | 6 (1.6%)                       | 12.5 (13.8)                                          |                              |
| <b>Location of high school</b>             |                                |                                                      |                              |
| Gauteng Province                           | 204 (55.9%)                    | 20.0 (25.4)                                          | 0.796                        |
| Outside Gauteng Province                   | 158 (43.3%)                    | 20.6 (24.8)                                          |                              |
| Missing                                    | 3 (0.8%)                       | 25.0 (25.0)                                          |                              |
| <b>Type of high school</b>                 |                                |                                                      |                              |
| Private                                    | 40 (11.0%)                     | 23.1 (25.2)                                          | 0.238                        |
| Public                                     | 287 (78.6%)                    | 19.5 (25.2)                                          |                              |
| Missing                                    | 38 (10.4%)                     | 23.6 (25.5)                                          |                              |
| <b>Tuition paid by</b>                     |                                |                                                      |                              |
| Parent                                     | 138 (37.5%)                    | 18.4 (24.5)                                          | 0.175                        |
| Loan or scholarship                        | 197 (54.3%)                    | 20.9 (25.1)                                          |                              |
| Other                                      | 29 (8.0%)                      | 26.9 (28.4)                                          |                              |
| Missing                                    | 1 (0.2%)                       | -                                                    |                              |
| <b>Housing</b>                             |                                |                                                      |                              |
| Student residence                          | 191 (52.3%)                    | 20.6 (24.7)                                          | 0.599                        |
| Other                                      | 156 (42.7%)                    | 20.2 (26.4)                                          |                              |
| Missing                                    | 18 (4.9%)                      | 18.7 (19.1)                                          |                              |
| <b>Health insurance</b>                    |                                |                                                      |                              |
| Private                                    | 97 (26.6%)                     | 18.8 (23.0)                                          | 0.753                        |

|                               |             |             |       |
|-------------------------------|-------------|-------------|-------|
| None/other                    | 231 (63.3%) | 21.3 (26.3) |       |
| Unknown                       | 37 (10.1%)  | 18.4 (23.4) |       |
| <b>Food security</b>          |             |             |       |
| Food secure                   | 304 (86.3%) | 21.0 (25.1) | 0.762 |
| Food insecure                 | 46 (12.6%)  | 20.3 (25.0) |       |
| Missing                       | 15 (4.1%)   | 18.6 (29.3) |       |
| <b>Socio-economic status*</b> |             |             |       |
| Low                           | 97 (26.6%)  | 20.6 (24.6) | 0.466 |
| Medium                        | 96 (26.3%)  | 21.9 (23.8) |       |
| High                          | 99 (27.1%)  | 18.4 (23.6) |       |
| Missing                       | 73 (20.0%)  | 20.7 (29.6) |       |
| <b>Tested for HIV</b>         |             |             |       |
| Never/Other/Missing           | 152 (41.6%) | 21.8 (25.2) | 0.573 |
| <6 months                     | 164 (44.9%) | 19.4 (25.5) |       |
| 6 to <12 months               | 27 (7.4%)   | 22.3 (24.3) |       |
| 12 to <24 months              | 10 (2.7%)   | 11.6 (17.4) |       |
| ≥24 months                    | 12 (3.3%)   | 17.7 (28.3) |       |

Suppl. Table 3, continued

| HIV knowledge and risk perception                                                                   |             |             |        |
|-----------------------------------------------------------------------------------------------------|-------------|-------------|--------|
| <b>Knowledge of HIV<sup>s</sup></b>                                                                 |             |             |        |
| High                                                                                                | 187 (51.2%) | 18.5 (24.4) | 0.177  |
| Low                                                                                                 | 178 (48.8%) | 22.3 (25.9) |        |
| <b>Risk perception of HIV<sup>ss</sup></b>                                                          |             |             |        |
| High                                                                                                | 141 (38.6%) | 16.8 (23.8) | 0.016  |
| Low                                                                                                 | 224 (61.4%) | 22.5 (25.8) |        |
| <b>ART reduces transmission risk</b>                                                                |             |             |        |
| True                                                                                                | 240 (65.8%) | 22.1 (26.1) | 0.075  |
| False                                                                                               | 118 (32.3%) | 17.0 (23.4) |        |
| Missing                                                                                             | 7 (1.9%)    | 17.3 (19.1) |        |
| <b>Consequences of stopping HIV treatment</b>                                                       |             |             |        |
| Reported “You become more infectious”                                                               | 116 (31.8%) | 23.5 (28.3) | 0.169  |
| Did not report “You become more infectious”                                                         | 249 (68.2%) | 18.8 (23.4) |        |
| <b>Someone can get HIV/AIDS by having one sexual encounter with an HIV infected person</b>          |             |             |        |
| True                                                                                                | 350 (95.9%) | 20.5 (25.3) | 0.678  |
| False                                                                                               | 13 (3.6%)   | 17.1 (23.2) |        |
| Missing                                                                                             | 2 (0.6%)    | 19.8 (11.3) |        |
| <b>Having sexual intercourse less frequently may reduce your risk of becoming infected with HIV</b> |             |             |        |
| True                                                                                                | 202 (55.3%) | 24.4 (26.7) | 0.0002 |
| False                                                                                               | 160 (43.8%) | 15.3 (22.3) |        |
| Missing                                                                                             | 3 (0.8%)    | 13.2 (13.9) |        |

\$ as described in <sup>16</sup>, <sup>ss</sup> as described in <sup>20</sup>, <sup>sss</sup> P-values are Kruskal-Wallis tests of the null hypothesis that the rank sum of “perceived TasP efficacy” was the same in each group (e.g. male, female, missing).

**Suppl Figure 1. Differences in perceived risk: (a) 1 vs. 52 sex acts and (b) ART vs. no ART.**

(a)

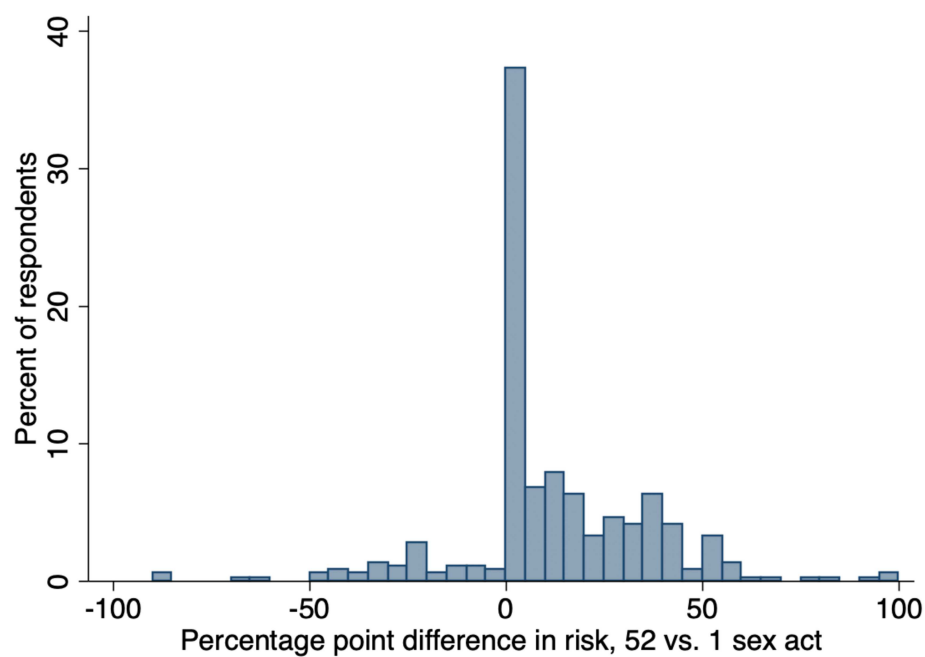

(b)

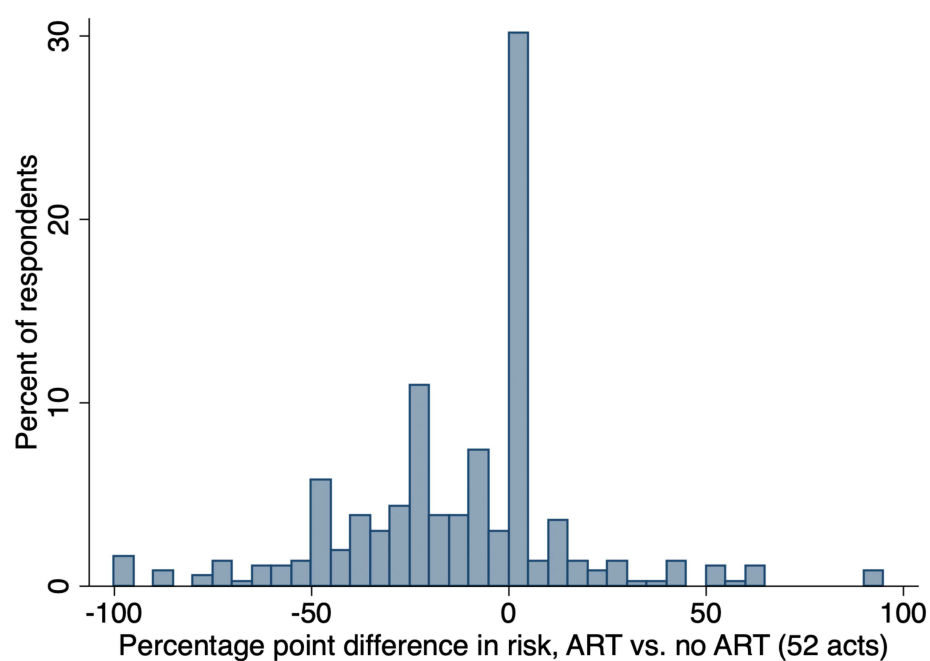

Supplement: sextrans-2021-055031supp001_data_supplement.pdf [file sextrans-2021-055031supp001_data_supplement.pdf]
